# Supplementary material
Source: PubMed Central journal article supplement (PMC6764898)
Supplement: NIHMS1023739-supplement-Supp_info.pdf [file NIHMS1023739-supplement-Supp_info.pdf]

# MOLECULAR ECOLOGY RESOURCES

## Supplemental Information for:

### Genome analyses of the new model protist *Euplotes vannus* focusing on genome rearrangement and resistance to environmental stressors

Xiao Chen, Yaohan Jiang, Feng Gao, Weibo Zheng, Timothy J. Krock, Naomi A. Stover, Chao Lu, Laura A. Katz, Weibo Song

#### Table of Contents:

|                    |                                   |
|--------------------|-----------------------------------|
| <b>Figure S1</b>   | Page 2                            |
| <b>Figure S2</b>   | Page 3                            |
| <b>Figure S3</b>   | Page 4                            |
| <b>Figure S4</b>   | Page 5                            |
| <b>Figure S5</b>   | Page 6                            |
| <b>Figure S6</b>   | Page 7                            |
| <b>Figure S7</b>   | Page 8                            |
| <b>Figure S8</b>   | Page 9                            |
| <b>Figure S9</b>   | Page 10                           |
| <b>Table S1</b>    | Page 11-12                        |
| <b>Table S2</b>    | Page 13                           |
| <b>Table S3</b>    | Page 14                           |
| <b>Table S4-S7</b> | separated supplementary data file |

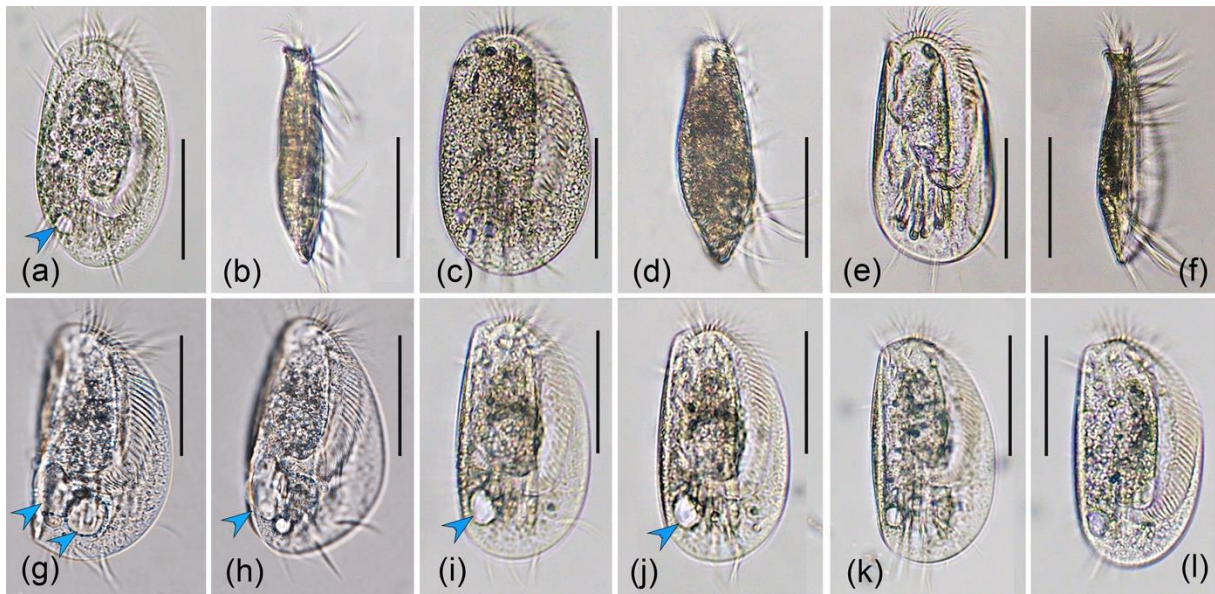

**Figure S1.** *Euplotes vannus* from life under different conditions. (a, b) Ventral and lateral views of the cell under normal conditions (20 °C and 30 psu). Arrowhead indicates the contractile vacuole. (c, d) Ventral and lateral views of the cell under low salinity (20 °C and 10 psu). (e, f) Ventral and lateral views of the cell under high salinity (20 °C and 60 psu). (g, h) Ventral views of the cell under low temperature (4 °C and 30 psu). Arrowheads indicate the bubbles. (i, j) Ventral views of the cell under high temperature (35 °C and 30 psu). Arrowhead indicates the usual contractile vacuole. (k, l) Ventral views of the cell in presence of free ammonia (100 mg/L  $\text{NH}_4\text{Cl}$ , pH 8.2, 20 °C and 30 psu).

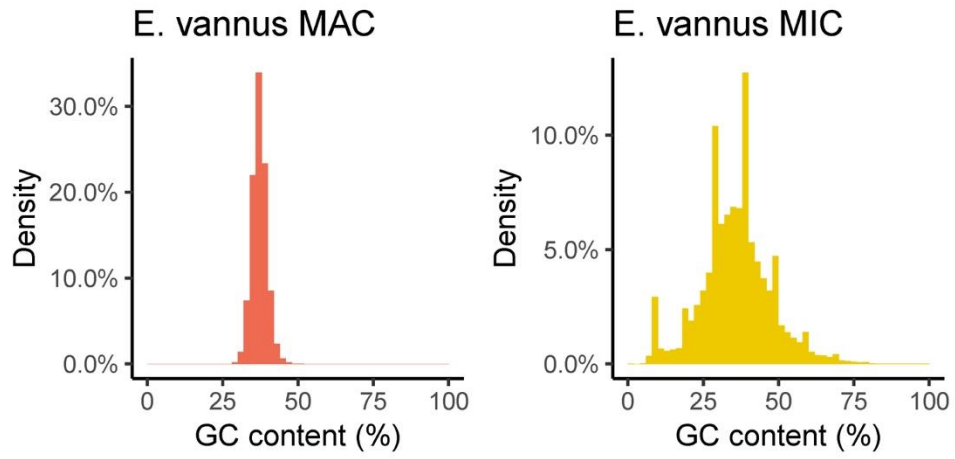

**Figure S2.** GC content distribution of MAC and MIC contigs of *Euplotes vannus*.

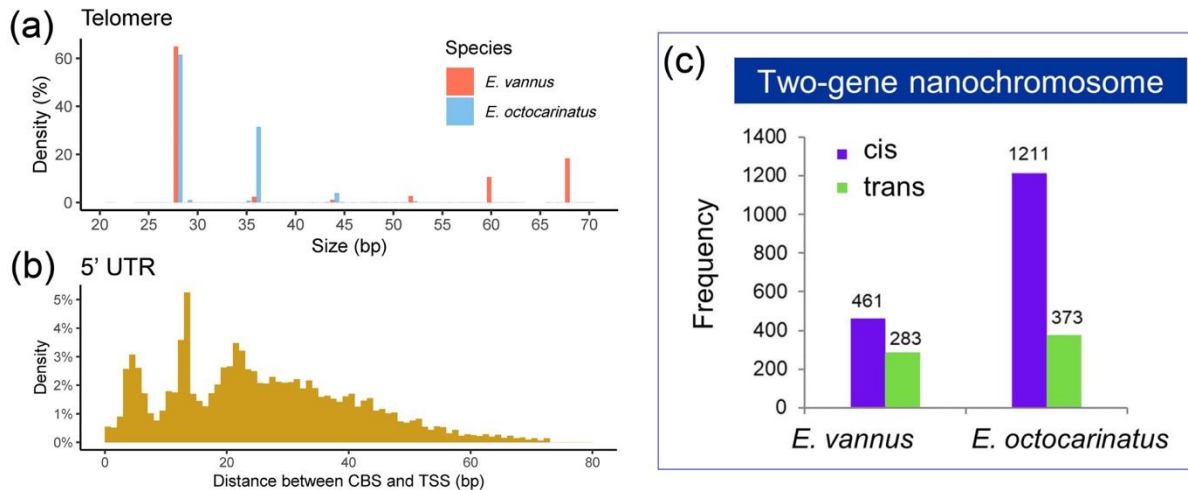

**Figure S3.** Size distribution of telomeres and 5' UTRs and the frequency of two-gene nanochromosomes in *Euplotes vannus* MAC. (a) Size distribution of telomeres in *Euplotes vannus* and *E. octocarinatus*. (b) Distribution of relative distance (5' UTR) between chromosome breakage sites (CBSs) and transcription start sites (TSSs) on 6588 *Euplotes vannus* nanochromosomes. (c) Two-gene nanochromosomes detected in MACs of *E. vannus* and *E. octocarinatus*. Violet bars denote the frequency of nanochromosomes containing genes transcribed in a same strand (*cis*) and green bars denote that of nanochromosomes containing genes transcribed in two different strands (*trans*).

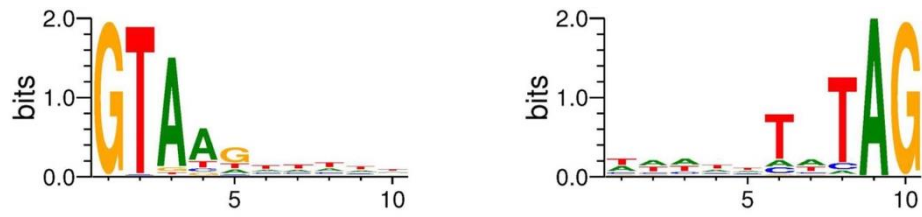

**Figure S4.** Schematic representation of the exon/intron boundaries with WebLogo in all 78661 introns in *Euplotes vannus* MAC genome. The GTR and YAG motifs are well conserved.

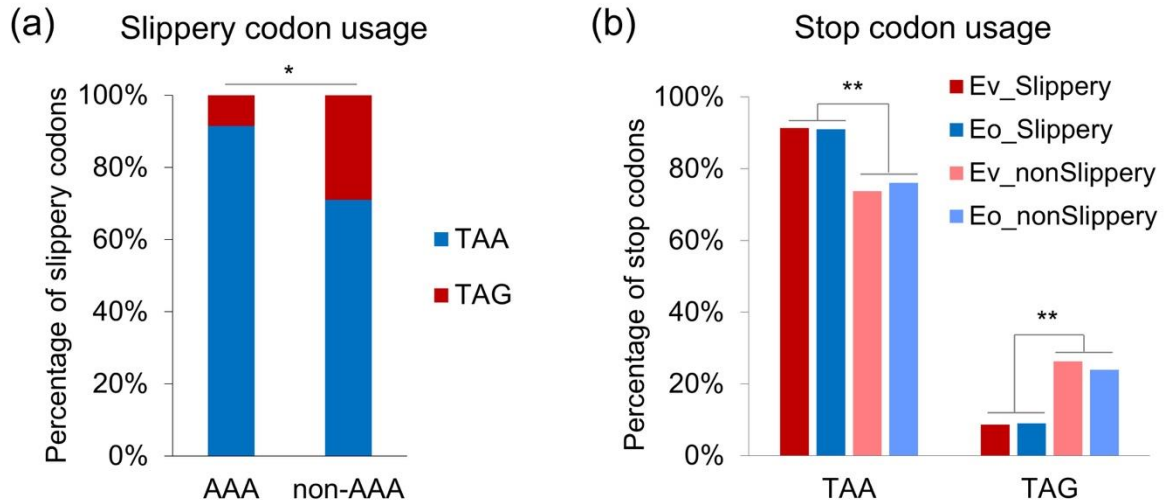

**Figure S5.** Slippery and stop codon usage in frameshifting transcripts. (a) Slippery codon usage in frameshifting sites with AAA and non-AAA upstream codons of *Euplotes vannus*. The asterisk denotes the statistically significant difference in Fisher's exact test ( $p = 0.0382$ ). (b) Slippery and non-slippery stop codon usage in transcripts of *Euplotes vannus* (Ev) and *E. octocarinatus* (Eo). Asterisks denote the statistically significant difference in analysis of variance (ANOVA) ( $p = 0.005024$ ).

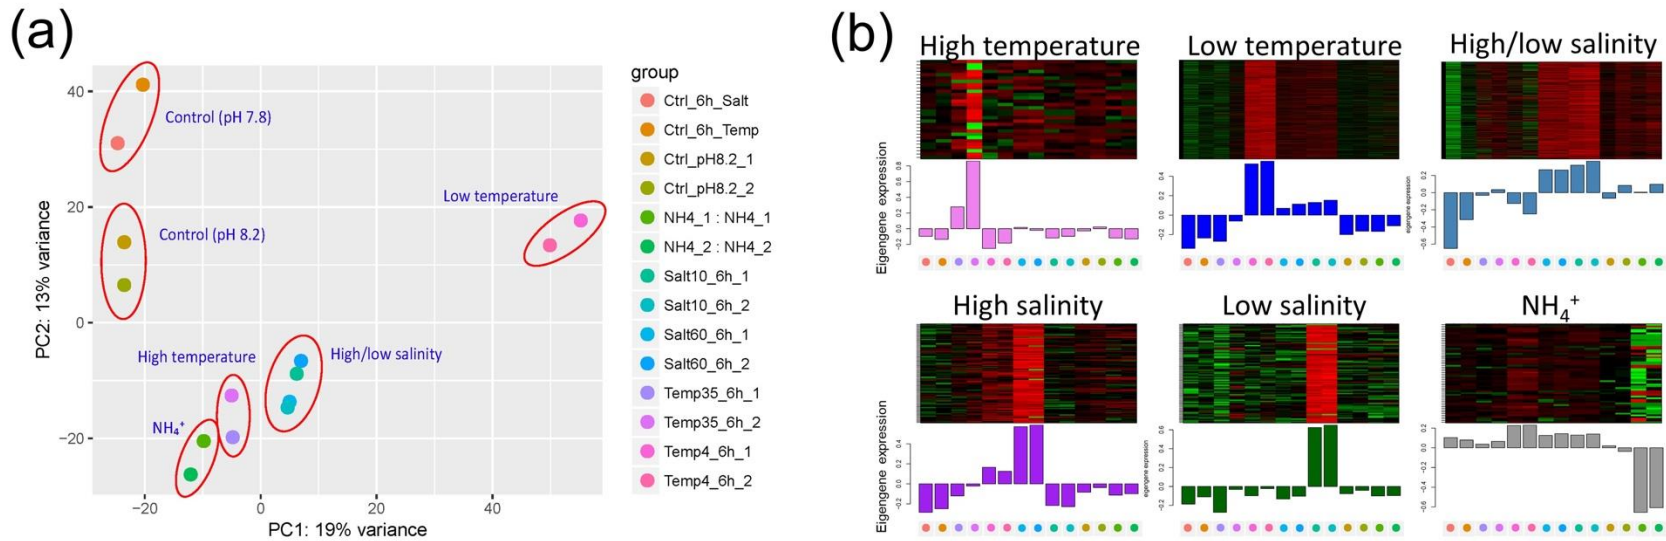

**Figure S6.** Differential gene expression and gene co-expression analyses under temperature, salinity and free ammonia stresses in *Euplotes vannus* (relative to Figure 5). (a) PCA analysis on gene expression under different stresses. (b) Different environmental stresses activated or deactivated different gene modules. The samples under different environmental stresses are denoted by dots on x-axis in the same color annotation as Figure S5a. The co-expressed genes in each module see Table S7.



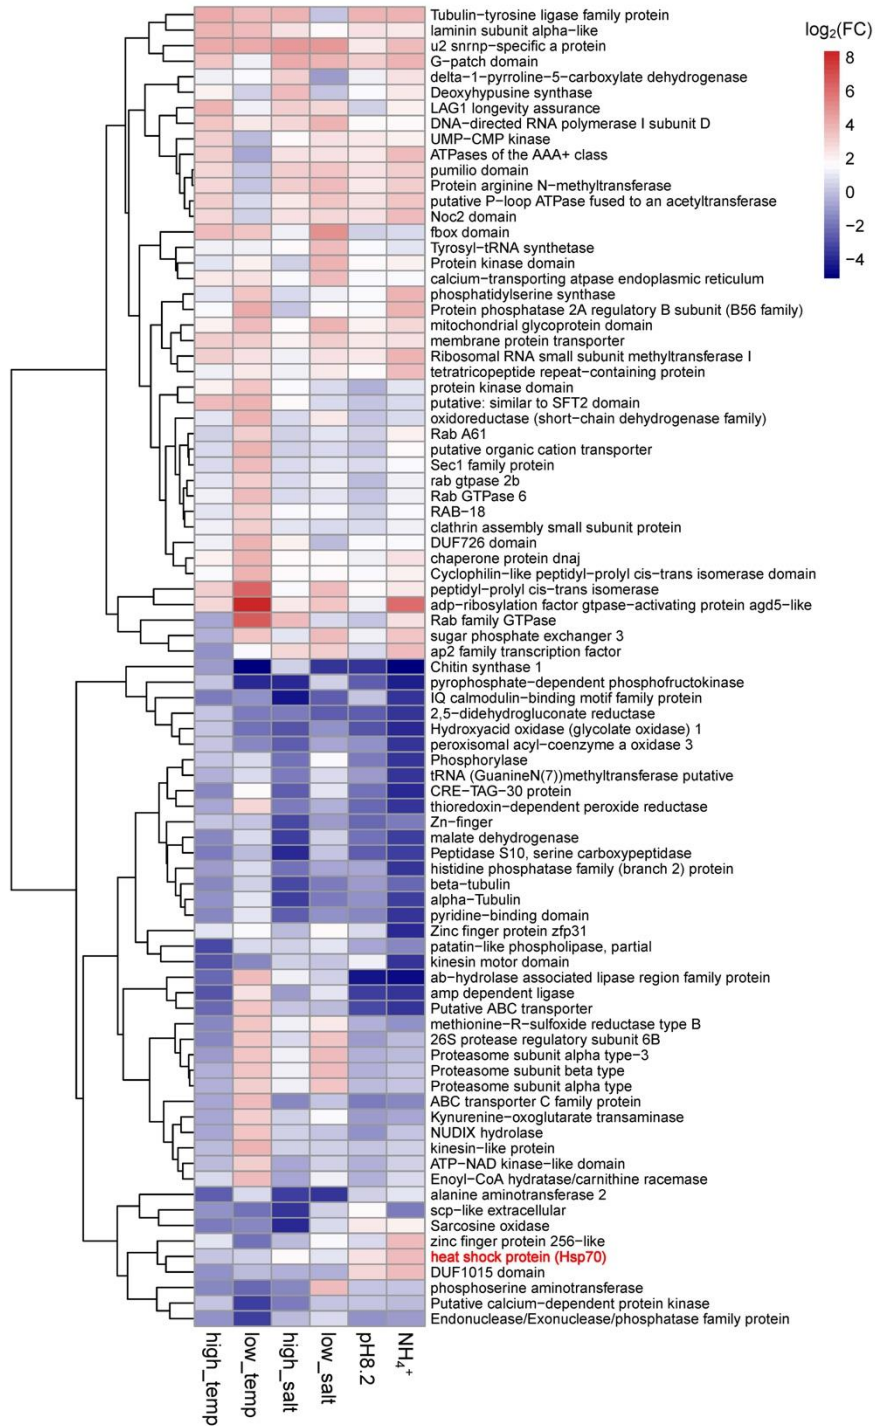

**Figure S7.** Top 100 differentially expressed genes under temperature, salinity and free ammonia stresses in *Euplotes vannus* (relative to Figure 5 and Figure 6). The numbers in the scale bar denote the log<sub>2</sub> values of gene expression fold change between cells under stresses and cells as control. Analysis based on two biological replicates.



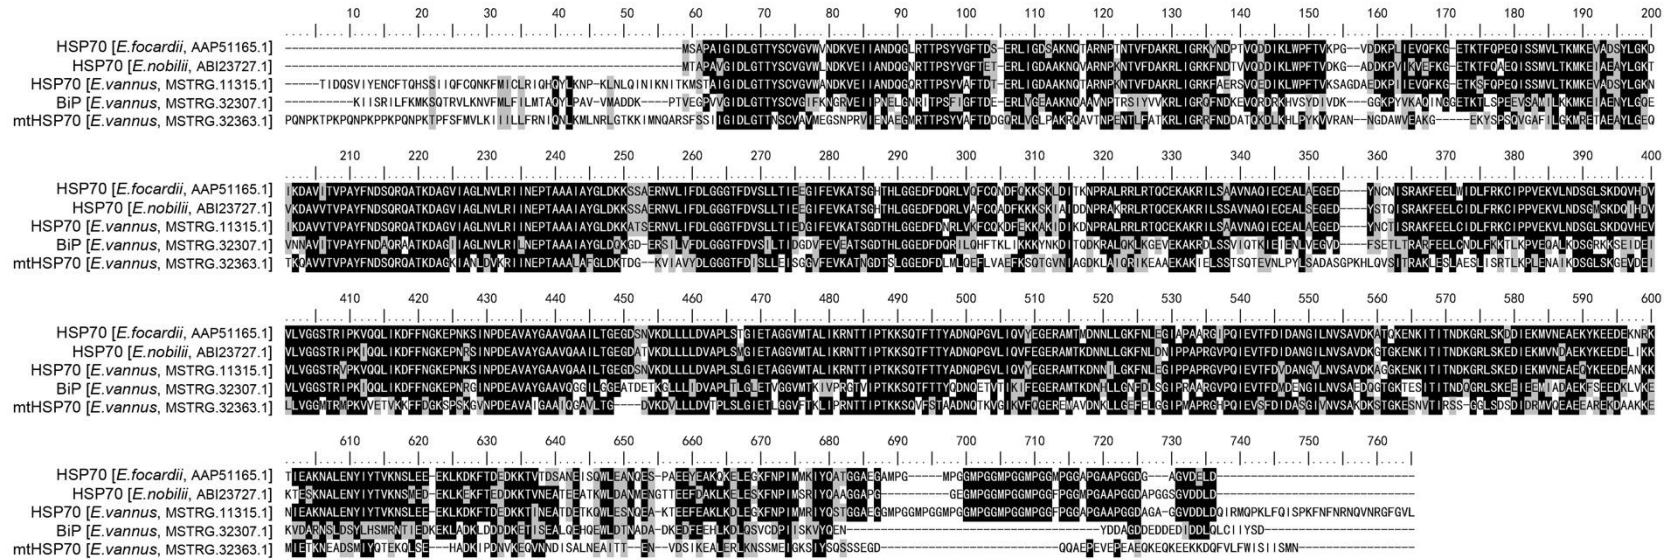

**Figure S8.** Sequence alignment of Hsp70 homologs in *Euplotes vannus*, *E. focardii* and *E. nobilii*, as well as other two relatively distant homologs of Hsp70, BiP (Binding immunoglobulin protein) and mtHsp70 (mitochondrial Hsp70).

(a)

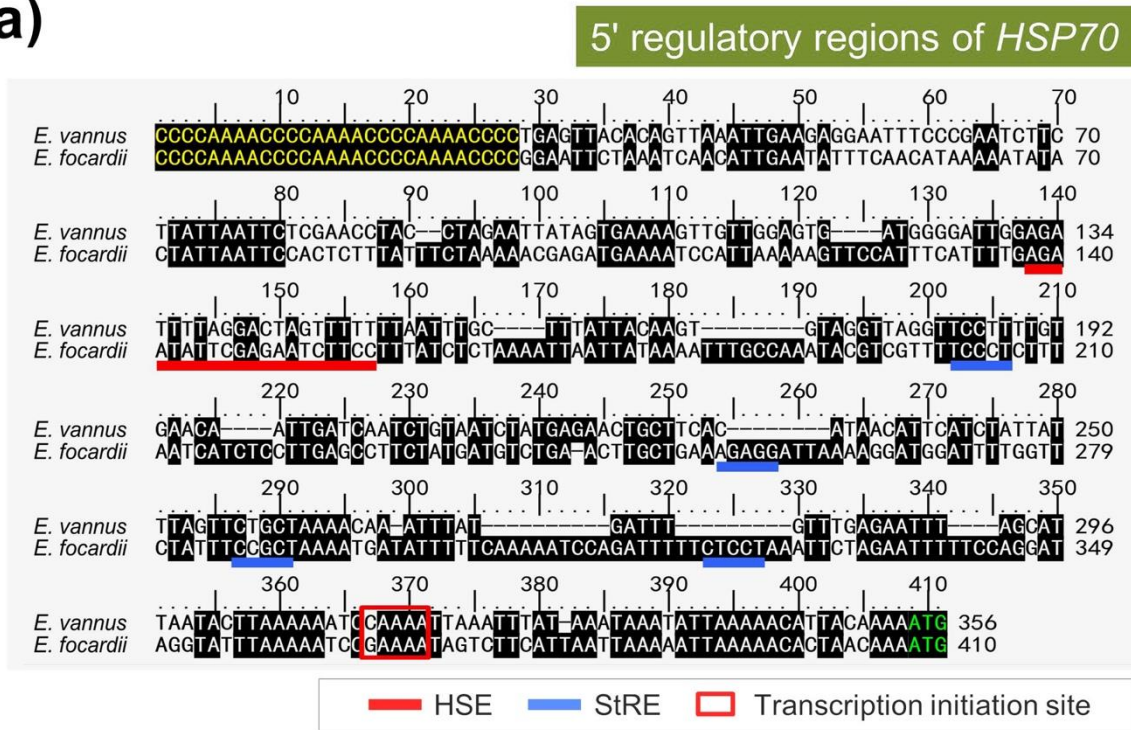

(b)

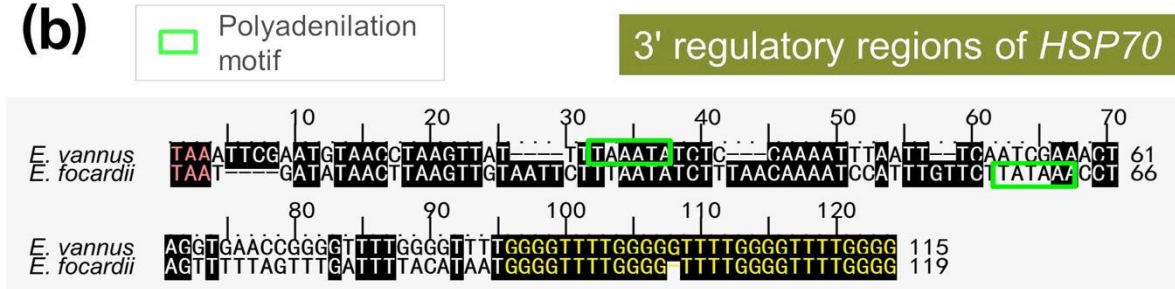

**Figure S9.** Sequence alignment of 5' and 3' regulatory regions of Hsp70 genes in *Euplotes vannus* and *E. focardii* (relative to Figure 6c). (a) Nucleotide sequence alignment of the 5' regulatory regions of HSP70 genes between *E. vannus* and *E. focardii*. The identities are shaded; the telomeric C<sub>4</sub>A<sub>4</sub> repeats and translation initiation codons (ATG) are in yellow and green, respectively; putative sites for the transcription initiation are boxed; sequence motifs bearing agreement with HSE and StRE elements are indicated by red and blue bars, respectively. (b) Nucleotide sequence alignment of the 3' regulatory regions of the *E. vannus* and *E. focardii* HSP70 genes; neither of them carries ARE elements in the 3' regulatory region. The identities are shaded; the telomeric G<sub>4</sub>T<sub>4</sub> repeats and translation stop codons (TAA) are in red; putative polyadenylation motifs are boxed.

**Table S1.** Information of accession of genome/transcriptome assemblies of 32 ciliates.

| No        | Class               | Subclass           | Order            | Species                                                          | Data source | Accession Number | Reference                 |
|-----------|---------------------|--------------------|------------------|------------------------------------------------------------------|-------------|------------------|---------------------------|
| 1         | Oligohymenophorea   | Hymenostomatia     | Tetrahymenida    | <i>Tetrahymena thermophila</i>                                   | NCBI        | GCA_000189635.1  | Eisen, et al (2006)       |
| 2         | Oligohymenophorea   | Hymenostomatia     | Ophryoglenida    | <i>Ichthyophthirius multifiliis</i>                              | NCBI        | GCA_000220395.1  | Coyne, et al. (2011)      |
| 3         | Oligohymenophorea   | Scuticociliatia    | Philasterida     | <i>Anophryoides haemophila</i>                                   | MMETSP      | MMETSP1018       | Gentekaki, et al. (2017)  |
| 4         | Oligohymenophorea   | Scuticociliatia    | Philasterida     | <i>Uronema</i> sp.                                               | MMETSP      | MMETSP0018       | Gentekaki, et al. (2017)  |
| 5         | Oligohymenophorea   | Peniculia          | Peniculida       | <i>Paramecium tetraurelia</i>                                    | NCBI        | GCA_000165425.1  | Aury, et al. (2006)       |
| 6         | Colpodea            | -                  | Cyrtolophosidida | <i>Platyophrya macrostoma</i>                                    | MMETSP      | MMETSP0127       | Gentekaki, et al. (2017)  |
| 7         | Colpodea            | -                  | Cyrtolophosidida | <i>Aristerostoma</i> sp.                                         | MMETSP      | MMETSP0125       | Gentekaki, et al. (2017)  |
| 8         | Spirotrichea        | Choreotrichia      | Tintinnida       | <i>Favella taraikaensis</i>                                      | MMETSP      | MMETSP0434       | -                         |
| 9         | Spirotrichea        | Choreotrichia      | Tintinnida       | <i>Schmidingerella arcuata</i><br>[ <i>Favella ehrenbergii</i> ] | MMETSP      | MMETSP0123       | Gentekaki, et al. (2017)  |
| 10        | Spirotrichea        | Choreotrichia      | Choreotrichida   | <i>Strombidinopsis acuminatum</i>                                | MMETSP      | MMETSP0126       | Gentekaki, et al. (2017)  |
| 11        | Spirotrichea        | Choreotrichia      | Choreotrichida   | <i>Strombidium sulcatum</i>                                      | NCBI        | PRJNA335783      | Chen, et al. (2015)       |
| 12        | Spirotrichea        | Choreotrichia      | Choreotrichida   | <i>Strombidium inclinatum</i>                                    | MMETSP      | MMETSP0208       | Gentekaki, et al. (2017)  |
| 13        | Spirotrichea        | Choreotrichia      | Choreotrichida   | <i>Strombidium rassoulzadegani</i>                               | MMETSP      | MMETSP0449       | -                         |
| 14        | Spirotrichea        | Stichotrichia      | Sporadotrichida  | <i>Oxytricha trifallax</i>                                       | NCBI        | GCA_000295675.1  | Swart, et al. (2013)      |
| 15        | Spirotrichea        | Stichotrichia      | Sporadotrichida  | <i>Stylonychia lemnae</i>                                        | NCBI        | GCA_000751175.1  | Aeschlimann et al. (2014) |
| 16        | Spirotrichea        | Stichotrichia      | Urostylida       | <i>Pseudokeronopsis</i> sp. 1                                    | MMETSP      | MMETSP1396       | -                         |
| 17        | Spirotrichea        | Stichotrichia      | Urostylida       | <i>Pseudokeronopsis</i> sp. 2                                    | MMETSP      | MMETSP0211       | -                         |
| 18        | Spirotrichea        | Hypotrichia        | Euplotida        | <i>Euplotes focardii</i>                                         | MMETSP      | MMETSP0205       | Gentekaki, et al. (2017)  |
| 19        | Spirotrichea        | Hypotrichia        | Euplotida        | <i>Euplotes harpa</i>                                            | MMETSP      | MMETSP0213       | Gentekaki, et al. (2017)  |
| 20        | Spirotrichea        | Hypotrichia        | Euplotida        | <i>Euplotes octocarinatus</i>                                    | -           | -                | Wang, et al. (2018)       |
| 21        | Spirotrichea        | Hypotrichia        | Euplotida        | <i>Euplotes crassus</i>                                          | MMETSP      | MMETSP1380       | -                         |
| <b>22</b> | <b>Spirotrichea</b> | <b>Hypotrichia</b> | <b>Euplotida</b> | <b><i>Euplotes vannus</i></b>                                    | <b>-</b>    | <b>-</b>         | <b>The current work</b>   |
| 23        | Litostomatea        | Haptoria           | Pleurostomatida  | <i>Litonotus</i> sp.                                             | MMETSP      | MMETSP0209       | Gentekaki, et al. (2017)  |
| 24        | Protocruziea        | Protocruziidia     | Protocruziida    | <i>Protocruzia adherens</i>                                      | MMETSP      | MMETSP0216       | Gentekaki, et al. (2017)  |
| 25        | Mesodiniea          | -                  | -                | <i>Myrionecta rubra</i>                                          | MMETSP      | MMETSP0798       | -                         |

|    |               |   |                |                              |        |                 |                           |
|----|---------------|---|----------------|------------------------------|--------|-----------------|---------------------------|
| 26 | Mesodiniea    | - | -              | <i>Mesodinium pulex</i>      | MMETSP | MMETSP0467      | -                         |
| 27 | Prostomatea   | - | Prorodontida   | <i>Tiarina fusus</i>         | MMETSP | MMETSP0472      | -                         |
| 28 | Heterotrichea | - | Heterotrichida | <i>Climacostomum virens</i>  | MMETSP | MMETSP1397      | -                         |
| 29 | Heterotrichea | - | Heterotrichida | <i>Blepharisma japonicum</i> | MMETSP | MMETSP1395      | -                         |
| 30 | Heterotrichea | - | Heterotrichida | <i>Fabrea salina</i>         | MMETSP | MMETSP1345      | -                         |
| 31 | Heterotrichea | - | Heterotrichida | <i>Stentor coeruleus</i>     | NCBI   | GCA_001970955.1 | Slabodnick, et al. (2017) |
| 32 | Heterotrichea | - | Heterotrichida | <i>Condylostoma magnum</i>   | MMETSP | MMETSP0210      | Gentekaki, et al. (2017)  |

**Table S2.** Genomic and transcriptomic reads mapping information.

| Sample       | Source | Input reads | Mapped reads      | Note                                              |
|--------------|--------|-------------|-------------------|---------------------------------------------------|
| Genome       | DNA    | 559039802   | 392763937 (70.3%) | Coverage = 640X                                   |
| Starvation_1 | RNA    | 20175266    | 15411886 (76.4%)  | Starved cells, replicate 1                        |
| Starvation_2 | RNA    | 25939381    | 23501079 (90.6%)  | Starved cells, replicate 2                        |
| Vegetative_1 | RNA    | 22130139    | 15634943 (70.7%)  | Vegetative cells, replicate 1                     |
| Vegetative_2 | RNA    | 22656934    | 18753144 (82.8%)  | Vegetative cells, replicate 2                     |
| Ctrl_1       | RNA    | 27410007    | 27410007 (82.8%)  | Control, pH 7.8, 20 °C and 35 psu, replicate 1    |
| Ctrl_2       | RNA    | 28426577    | 28426577 (83.9%)  | Control, pH 7.8, 20 °C and 35 psu, replicate 2    |
| Temp4_1      | RNA    | 24378854    | 24378854 (74.3%)  | Cells under low temperature 4°C, replicate 1      |
| Temp4_2      | RNA    | 24728188    | 24728188 (72.4%)  | Cells under low temperature 4°C, replicate 2      |
| Temp35_1     | RNA    | 27392914    | 27392914 (80.1%)  | Cells under high temperature 35°C, replicate 1    |
| Temp35_2     | RNA    | 27802672    | 27802672 (83.1%)  | Cells under high temperature 35°C, replicate 2    |
| Salt10_1     | RNA    | 24108428    | 24108428 (84.0%)  | Cells under low salinity 10 psu, replicate 1      |
| Salt10_2     | RNA    | 27871505    | 27871505 (80.1%)  | Cells under low salinity 10 psu, replicate 2      |
| Salt60_1     | RNA    | 25259917    | 25259917 (82.8%)  | Cells under high salinity 60 psu, replicate 1     |
| Salt60_2     | RNA    | 27558276    | 27558276 (72.1%)  | Cells under high salinity 60 psu, replicate 2     |
| pH8.2_1      | RNA    | 26705063    | 26705063 (84.7%)  | Cells under pH 8.2, 20 °C and 35 psu, replicate 1 |
| pH8.2_2      | RNA    | 24499855    | 24499855 (79.6%)  | Cells under pH 8.2, 20 °C and 35 psu, replicate 2 |
| NH4_1        | RNA    | 28061657    | 28061657 (84.2%)  | Cells under presence of free ammonia, replicate 1 |
| NH4_2        | RNA    | 24413430    | 24413430 (81.1%)  | Cells under presence of free ammonia, replicate 2 |

**Table S3.** List of identified ncRNAs in *Euplotes vannus* MAC genome.

| Rfam acc. | Rfam id           | <i>E. vannus</i> MAC |
|-----------|-------------------|----------------------|
| RF00001   | 5S_rRNA           | 4                    |
| RF00002   | 5_8S_rRNA         | 5                    |
| RF00003   | U1                | 2                    |
| RF00004   | U2                | 6                    |
| RF00005   | tRNA              | 109                  |
| RF00009   | RNaseP_nuc        | 1                    |
| RF00010   | RNaseP_bact_a     | 1                    |
| RF00012   | U3                | 1                    |
| RF00015   | U4                | 2                    |
| RF00017   | SRP_euk_arch      | 2                    |
| RF00020   | U5                | 2                    |
| RF00023   | tmRNA             | 1                    |
| RF00025   | Telomerase-cil    | 2                    |
| RF00026   | U6                |                      |
| RF00029   | Intron_gpII       | 3                    |
| RF00059   | TPP               | 1                    |
| RF00162   | SAM               |                      |
| RF00177   | SSU_rRNA_5        | 4                    |
| RF00513   | Trp_leader        |                      |
| RF00876   | mir-684           | 1                    |
| RF01059   | mir-598           | 1                    |
| RF01118   | PK-G12rRNA        | 1                    |
| RF01726   | SAM-II_long_loops |                      |
| RF01848   | ACEA_U3           |                      |
| RF01852   | tRNA-Sec          |                      |
| RF01960   | SSU_rRNA_eukarya  |                      |

**Table S4.** Annotation information of repeats in the MAC genome assembly of *Euplotes vannus* (separated supplementary data file).

**Table S5.** Expression and annotation information of *Euplotes vannus* genes (separated supplementary data file).

**Table S6.** Gene rearrangement events in *Euplotes vannus* (separated supplementary data file).

**Table S7.** Co-expressed genes in *Euplotes vannus* under dramatic environmental changes, including low/high temperature, low/high salinity and the presence of free ammonia (separated supplementary data file).
